# Supplementary material
Source: publisher figshare collection journal article supplement (https://acs.figshare.com/ndownloader/files/8198375)
Supplement: Supplementary file 1 [file 8198375]

Archive with 9 entries (9 files):
- Supporting Information/SupportingInformation.pdf
- Supporting Information/Video A-Pure ZIF-8.mp4
- Supporting Information/Video B-Pure ZIF-90.mp4
- Supporting Information/Video C-ZIF-8-90 de novo hybrid.mp4
- Supporting Information/Video D-ZIF-8-90 de novo hybrid blue only.mp4
- Supporting Information/Video E-ZIF-8-90 de novo hybrid green only.mp4
- Supporting Information/Video F-ZIF-8-90 SALE hybrid 1.mp4
- Supporting Information/Video G-ZIF-8-90 SALE hybrid 2.mp4
- Supporting Information/Video H-ZIF-8-90 SALE hybrid 3.mp4
